# Supplementary material for: Fractured genes: a novel genomic arrangement involving new split inteins and a new homing endonuclease family
Source: PubMed Central journal article supplement — Nucleic Acids Res. 2009 Mar 5;37(8):2560–73. doi: 10.1093/nar/gkp095 (PMC2677866; doi:10.1093/nar/gkp095), 2009-03-05
Supplement: gkp095_1.pdf [file gkp095_1.pdf]

## Supplementary Figure legends

**Figure S1:** Sequences of new split-inteins, grouped by the type of host protein.

**Figure S2:** Output of a CD-search (Marchler-Bauer and Bryant 2004) sequence-to-multiple alignments comparison, of the putative DNA-repair exonuclease synthetically joined products (excluding the VSR region) with the SbcD multiple sequence alignment (COG0420). The multiple alignment is represented by its consensus sequence. The joining point of the putative DNA-repair sequence parts includes an “x” and is marked by an arrow.

**Figure S3:** (A) Annotated multiple sequence alignment of group I introns that include Vsr-like ORFs. The *Bacillus thuringiensis* phage 0305φ8-36 (BP0305phi; NCBI accession NC\_009760.1) and *Bacillus cereus* AH1134 (bacce-AH1; NCBI accession NZ\_ABDA01000203.1). Group I introns of recA genes are aligned with the *Bacillus anthracis* Sterne recA group I intron (bacan-Ste; NCBI accession AF229167.1). The group I intron regions are indicated by a red line. Their predicted secondary structures (P1 to P10) and conserved sequence motifs (R and S) are annotated according to the *B. anthracis* intron (Ko et al. 2002). Protein coding regions have their amino acid sequence above them. The recA exons are highlighted in yellow, the Vsr-like ORFs are highlighted in green, the putative hairpins at the 5' of the Vsr-like ORFs are double underlined, the conserved Vsr-like motifs (Figure 3) are highlighted in grey, and group I introns conserved core regions are highlighted in cyan. (B) Predicted RNA secondary structure of the group I intron of recA gene from *Bacillus thuringiensis* phage 0305φ8-36 (BP0305phi; NCBI accession NC\_009760.1). Predicted secondary structures P1 to P10, conserved sequence elements R and S, the G site, and the ORF insertion point and its stop codon are shown according to (A).

**Figure S4:** Conserved nucleotide motifs in 5' untranslated regions of endonuclease ORFs. Motifs were searched using MEME. The position is of the distance of the sequence 3' ends from the translation initiation codons. The motifs are shown aligned with their logos (calculated using the WebLogo server at <http://weblogo.berkeley.edu/>) (A) and in the context of the whole region (B). In the later view, the sequences are aligned by their initiation codons, at their 3' termini, that are also boxed. “...” indicates unknown sequence data.

**Table S1**

Protein hosts and the GOS reads used as a source for their assembly.

| Protein host | GOS location    | JCVI reads                                                                          | JCVI assemblies                           | Probable origin             |
|--------------|-----------------|-------------------------------------------------------------------------------------|-------------------------------------------|-----------------------------|
| gp41-1       | Lake Gatun      | 1095368026018+1095366023924+1095333010713+1093023041874+1095333009945+1093023002130 | 1097207246556+1097207259355+1101669430723 | T4-like viruses             |
| gp41-2       | Lake Gatun      | 1101669426331                                                                       |                                           |                             |
| gp41-3       | Lake Gatun      | 1095351007293+1095356001149                                                         | 1061005454744                             |                             |
| gp41-4       | Lake Gatun      | 093022163129+1093022103376                                                          | 1097207258370                             |                             |
| gp41-5       | Lake Gatun      | 1091143037864                                                                       | 1097207240963                             |                             |
| gp41-6       | Lake Gatun      | 1095337027236+1095306084054                                                         | 1097207277771                             |                             |
| gp41-7       | Off Nags Head   | 1093012253551+1092963600993                                                         | 1097205056197                             |                             |
| gp41-8       | Lake Gatun      | 1091143028835                                                                       | 1097207240798                             | T4-like viruses             |
| gp41-9       | Punta Cormorant | 1097156422586                                                                       |                                           |                             |
| IMPDH-1      | Lake Gatun      | 1091143056039+1095333020518+1091142153811+1095333021862                             | 1101669394623                             | Bacterial                   |
| IMPDH-2      | Lake Gatun      | 1095351023224+1093022056516+1093022126404+1095349055864                             | 1097207259656                             |                             |
| IMPDH-3      | Delaware Bay    | 1095899230244+1095898151644                                                         | 1101669181432                             |                             |
| DnaE-1       | Rangirora Atoll | 1092963363647+1092963253032                                                         | 1097263593299                             | Bacterial                   |
| DnaE-2       | Lake Gatun      | 1095349061806+1095328030710                                                         | 1101669426735                             |                             |
| DnaE-3       | Gulf Of Mexico  | 1093022142172+1093022142942                                                         | 1097205348472                             |                             |
| NrdJ-1       | Lake Gatun      |                                                                                     | 1101669428687                             | Bacterial and dsDNA viruses |
| NrdJ-2       | Lake Gatun      |                                                                                     | 1101669429579                             |                             |
| NrdA-1       | Lake Gatun      | 1095368021404+1095349056558                                                         | 1101669410105                             | Bacteria and viruses        |
| NrdA-2       | Rangirora Atoll | 1092963091065+1093006402449                                                         | 1097263589660                             |                             |
| NrdA-3       | Lake Gatun      | 1091143060848                                                                       | 1101669394741                             |                             |
| NrdA-4       | Lake Gatun      | 1091143047300+1091142207694                                                         | 1101669393609                             |                             |
| NrdA-5       | Punta Cormorant | 1095521346405                                                                       | 1101670305357                             |                             |
| NrdA-6       | Lake Gatun      | 1091142141262+1091143128742                                                         | 1097207263468                             |                             |
| NrdA-7       | Lake Gatun      | 1097207240466                                                                       |                                           |                             |
| DNA ligase   | Lake Gatun      | 1095326019642+1095337013586                                                         | 1097207283029                             | viruses                     |
| Terminase    | Lake Gatun      | 1095306046644+1095328063912                                                         | 1101669405733                             | Myoviridae viruses          |
| Unknown      | Off Key West    | 1097205249970                                                                       | 1091138266427                             |                             |

**Table S2**

List of salt bridges across the intein halves as calculated from their models.

**gp41-1**

3 ASP A - 103 ARG B  
41 LYS A - 107 ASP B  
45 LYS A - 102 GLU B  
48 LYS A - 98 GLU B  
52 GLU A - 92 LYS B  
52 GLU A - 93 LYS B  
53 ASP A - 92 LYS B  
55 LYS A - 120 ASP B  
80 GLU A - 96 LYS B  
87 LYS A - 120 ASP B

**IMPDH-1**

18 GLU A - 120 LYS B  
35 GLU A - 103 LYS B  
72 ARG A - 113 GLU B

**NrdA-2**

32 ASP A - 101 ARG B  
65 HIS A - 104 ASP B

**NrdJ-1**

55 ARG A - 128 ASP B  
72 LYS A - 140 ASP B  
75 ARG A - 124 GLU B  
97 ASP A - 116 LYS B  
98 ASP A - 114 LYS B  
98 ASP A - 116 LYS B  
100 GLU A - 114 LYS B

**gp41-8**

18 ARG A - 114 GLU B  
18 ARG A - 115 GLU B  
43 LYS A - 115 GLU B  
52 LYS A - 104 GLU B  
60 ARG A - 114 GLU B  
91 LYS A - 97 GLU B  
91 LYS A - 99 GLU B

# Figure S1

## N-inteins:

>gp41-1

CLDLKTVQVQTPQGMKEISNIQVGDVLSNTGYNEVLNVFPKSKKKSYPKITLEDGKEIICSEEHLFPTQTGEMNISGGLKEGMC  
LYVKE

>gp41-2

CLDLKTVQVQTPQGLKDISNIQVGDVLS

>gp41-3

CLDLKTVQVQTPQGMKEISNIQVGDVLSNTGYNEVLNVFPKSKKKS

>gp41-4

CLDLKTVQVQTPQGMKEISNIQVGDVLSNTGYNEVLNVFPKSKKKSYPKIT  
LEDGKEIICSEEHLFPTQTGEMNISGGLKEGMCCLYVKE

>gp41-5

CLDLKTVQVQTPQGMKEISNIQVGDVLSNTGYNEVLNVFPKSKKKSYPKIT  
LEDGKEIICSEEHLFPTQTGEMNISGGLKEGMCCLYVKE

>gp41-6

SYKITLEDGKEIICSEEHLFPTQNGEVNIKGLKEGMCCLYVKE

>gp41-7

CLDLKTVQVQTPQGMKELSNIQVGDVLSNTGYNQVLNVFPKSKKKSYPKIT  
LEDGKEIICSEEHLFPTQNGEVNIKGLKEGMCCLYVKE

>gp41-8

CLSLLDTMVTNGKAIEIRDVKVGDWLESECGPVQVTEVLPPIIKQPVFEIV  
LKSGKKIRVSANHKFPKTDGLKTINSLKVGDFLRSRAK

>IMPDH-1

CFVPGTLVNTENGLKKIEEIKVGDVFSHTGKLQEVVDTLIFDRDEEIIIS  
INGIDCTKNHEFYVIDKENANRVNEDNIHLFARWVHAEELDMKKHLLIELE

>DnaE-1

CFTKDTNITLTHGFMDEELDPKRDGVYIDKEGKHRINHDIYELHYMGRK  
EVFEIKTECGKTIKLTSDHEVMTQEGYKVFELNENDVLIKF

>DnaE-2

ILTNGEKFINEISCNDQIAYLTNHNSEIYNNDYEIIFQGKKEIFEIILENGTALELTED  
HEVMTQNGYKVKELNDDDSLVI

>NrdA-1

CVAGDTKIKIKYPESVGDQYGTWYWNVLEKEIQIEDLEDYIIMRECEIYDSNAPQIEVLSYNIETGEQEWKPIITAFQTS  
PKAKVMKITDEESGKSIVVTPHQVFTKNGRYVMAKDLIETDEPIIVNKDMNF

>NrdA-2

CLTGDADKIDVLDNIPISQISLEEVNLFNEGKEIYVLSYNIDTKEVEYKEISDAGLISESAEVLEIIDEETGQKIVCTPDHK  
VYTLNRYVSAKDLKEDDELVFS

>NrdA-4

CLAGDTTIVTVLEGDIVFEMTLENLVSLYKNVFSVSVLSFNPETQKQEFKPVNTAALMNPESKVLKITDSDTGKSI  
VCTPDHKVFTKNGRYVIASELNAEDILEIK

>NrdA-5

HTETVRRVGTITAFQTSKSKVMKITDEESGNSIVVTPHQVFTKNGRYVMAKNLIVETDELVIN

>NrdA-6

YVCSRDDTTGFKLICTPDHMIYTKNGRYIMAKYLKEDDELLINEIHLPT

>NrdJ-1

CLVGSSEIITRNYGKTTIKEVVEIFDNDKNIQVLAFTHTDNIEWAPIKAAQLTRPNAELVELEIDTLHGVTIRCTPDHPVY  
TKNGRYVRADELTDDELVVAI

>NrdJ-2

CLVGSSEIITRNYGKTTIKEVVEIFDNDKNIQVLAFTHTDNIEWAPIKAAQLTRPNAELVELEINTLHGVTIRCTPDHPVY  
TKNRDYVRADELTDDELVVAI

## C-inteins:

>gp41-1

MMLKKILKIEELDERELIDIEVSGNHLFYANDILTHNS

>gp41-2

MMLKKILKIEELDERELIDIEVSGNHLFYANAAILTHNS

>gp41-7

MMLKKILKIEELDERELIDIEVSGNH

>gp41-8

MCEIFENEIDWDEIASIEYVGVEETIDINVTNDRLEFFANGILTHNS

>gp41-9

MIMKNRERFITEKILNIEEIDDDLTVDIGMDNEDHYFVANDILTHNT

>IMPDH-1

MKFKLKEITSIETKHYK GK-VHDLTVNQDHSYNV-RGTVVHNS

>IMPDH-2

MKFTLEPITKIDSYEVTAEpVYDIEVENDHSFCVeNGFVVHNS

>IMPDH-3

MKFKLVEITSKETFNYSQ-VHDLTVEDDHSYSI-NNIVVHNS

>DnaE-2

MKNFWRKLLKLLKIKS IKKSRIDNVYDIHHRINYKVFDEHPNLIAEKIVISNC

>DnaE-3

MNLLGKQQT YDLEVAHHDHQYYL NNGILQSNS

>NrdA-2

MGLKIIKRESKEPVFDITVKDNSNFFANNILVHNC

>NrdA-3

MLKIEYLEEEI PVYDITVEETHNFFANDILIHNC

>NrdA-5

MLKIEYLEEEI PVYDITVEGTHNLAYSL

>NrdA-6

MGIKIRKLEQNRVYDIKVEKIIIFCANNILVHNC

>NrdA-7

MLKIEYLEEEI PVYDITVEKTNNFFANDILVHNC

>NrdJ-1

MEAKTYIGKLSRKIVSNEDTYDIQTSTHNFFANDILVHNS

>DNA ligase

MQIVRVKKI AKVESRDKFDLEVKKNNNFFANGVLVHNC

>Terminase

MLSDQVERKFTETVEVTDWQVDTDTGWQEV TASNQTI PYAVHELELDNGM

FLSCADTHIVFDQYLNEIFVQDLVPGQIQTVSGVSAVKSLTATQDQQQMYDLSVNSKDQRYTGGILSHNS

>unknown host

MDDLYMLDEDEIVSIELIGEEDTIDITVDDTHMFFANDIYTHNS





BP0305phi yValSerAspValAlaIleGlnArgTrpArgLysLysArgHisGlyLysPheLysProGlnIleAspThrSerThrHisLeuThrThrProGluArgArg  
CGTAAGTGATGTGCTATCCACAGATGGAGAAGAAAGACACCGTAAAGTTTAAAGCCACAAATGGATACATCGACACATCTAACACACCTGAACGTGCT  
bacce-AH1 yValSerAspThrCysValAlaLysArgArgLysGluLeuAsnValLysValArgLysLys AsnTyrAspThrLeuLeuGlnGln  
CGTATCCGATACATGTGTTGCTAAGAGGAGAAAAGAGCTTAATGTAAGGTCAGAAAGAAA AATTATGATACCTTACTGGAACAACAG  
bacan-Ste -----  
-----

BP0305phi ValLysGluIleLeuAspGluLeuAspIleValTyrPheThrHisHisValValGlyTrpAsnValAspPheTyrLeuGlyLysLysLeuAlaIleG  
GTAAAAGAAATACCTGATGAATTAGACATCGGTATTTACACATCACGTTGTAAGGATGGAATGTAGACTTCTATTTAGGTAAGAACTAGCGGATAG  
ValGluGlnMetLeuLeuSerLeuAspLeuAlaPheIleLysGlnLysArgIleAspLysTrpSerIleAspPheTyrLeuGlyArgLysTyrCysLeuA  
GTTGAACAGATGTTGTTAAGTTTAGATCTGGCGTTCATTAAGCAAAAAAGAAATCGATAAGTGGTCTATTGATTTCTACTTAGGTAGAAAATATTGTTTAG  
bacce-AH1 -----  
bacan-Ste -----

BP0305phi luValAsnGlyValTyrTrpHisSerLysGlnLysAsnValAspLysAspLysArgLysLeuSerGluLeuHisSerLysGlyTyrArgValLeuThrIl  
AAGTAAACGGTGTATATTGGCACAGTAAACAAAAGAAATGTAATAAGGATAAACGTAAGTTGCTGAACTACACAGTAAAGGATACCGGTATTAAACAA  
bacce-AH1 ATGValHisGlyLysTrpAlaHisSerLeuLysLysIleLysGluArgAspLysArgLysLeuLeuPheMetGluGluGlyCysTyrLysTyrLeuValIl  
ATGTCATGGGAAATGGGCACACTCACTCAAAAGATAAAAAGACAGATAAAAAGAAAACCTTTATTTATGGAAGAGGGCTGCTATAAATATCTGTTAT  
bacan-Ste -----  
-----

BP0305phi eGluAspAspGluLeuAsnAspIleAspLysValLysGlnGlnIleGlnLysPhe TrpValThrHisIleSerAsnGlyMet\*\*\*  
CGAAGACGATGAGTAAATGATATAGATAAGGTAAACACAAATACAAAAGTTT---TGGGTCAACCATATCAGTAATGGTATGTAAATAA CCTTGT  
bacce-AH1 eHisGluGluLeuAlaAsnLysGluLysValLeuGlnLysIleLysGluPheThrMetGlyPheProCys\*\*\*  
ACATGAAGAAGAGTATAGCAATAAAGAAAAGTCTTACAAAAGATTAAGGAGTTTACCATTGGGTTCCCTTGTCTAGTATAGCATGTTAAA-AACCTTGT  
bacan-Ste -----  
-----  
-----P10--P1-> <-P2-----P2-> <-P3-->

BP0305phi GAACGCAAGCAAAAAGCGGTGTCGTCGTAAGACG----GCTAACCGGTGACGGAAGGCTCCCAA-----TACCGTCCCAAGC-CCA-----ATAGG  
bacce-AH1 GAACCTTATTCCTAAG-GTGTA-CTATCCATATAGTGTCTAACCGGTCAAGCCCA-CATTATTTAGGGTA-TACCGTCCCAAGCT-CATAGTGATATGGG  
bacan-Ste GAACCTTATTCCTAAGGTGTAACCTATTCATATAGTGTCTAACCGGTCAAGCCCAACATTATTCAGGGTAAATACCGTCCCAAGCTCCATAGTATATGGG  
P3 > <-P3.1---P3.1-> <-P3.2-----P3.2-> <-P4--> <-P5-----P5-> <-P4-><P6 <-P6a-----

BP0305phi GAAGGTGTAGAGACTATCGAAA-GCACATCATACGATGGAAGCGAGTAGAGTAGGATGAGAGATTAGCACCATTCGAAGCGCAAGGCTCCTCGATAGAGGA  
bacce-AH1 GAAGG-GTAGAGACTAC-GAAA-GGACTTT-AGT-AACTAGTAGG-TACG  
bacan-Ste GAAGGTGTAGAGACTACCGAAAAGGACTTTTAGTAACTGAGTAGGTCAGGTCAGGCAGATGATAGGCTACTGTG--GAAGTCAAGGCTCTCTGTAAGAGA  
P6a > P6> <-P7---> <-P7.1-----P7.1-> <-P7.2-----P7.2-> <-P3-><-P8-----  
=R=motif==

BP0305phi TGAAGATATAGTCCATTACACTTAATGTGTAAG-----ProAsnValThrThrGlyGlyArgAlaLeuAlaPheTyrAlaSerLeu  
ccaaacgtgacaactggtggtcgtgctgtagcgttctctatgctcatta  
bacan-Ste TGAAGAGATAGTCCGGACTATAGAGATGGAATACTATAGATAGTG-----ProGluThrThrProGlyGlyArgAlaLeuLysPheTyrSerThrVal  
ccagaacaactccaggtggtcgtgctggtgaaattcttcaactggt  
P8> <-P7-> <-P9-----P9-> P10  
=S=motif====

BP0305phi ArgPheGlyMetAsnLysLeuLysLeuGlnAspSerAspProIleThrAspAspAspGlyLeuLysIleSerAlaArgValAlaLysAsnArgCysValT  
cgttttggtatgaataaactgaaactacaagatagtgacccaattaccgacgacgatggactgaaatcagcgctcgtggtgcaagaaccgatggtat  
bacan-Ste ArgLeuGluValArgArgAlaGluGlnLeuLysGlnGlyAsnAspIleValGlyAsnLysThrLysValLysValLysAsnLysValAlaPro  
cgtcttgaagtcgctgctgqggacaatataaacaaggtaacgacatcgttggttaataaacaagaagtaaaagttagtataaataaagtgqccacca----

BP0305phi yrAspAsnProTyrLysLysCysGluTyrTyrValIleTyrGluGlyValAspLysLeuThrGluIleMetGluAsnValGluProAlaGlyIleMe  
acgacaacccttacaataaactgtaattacgcttatttatggtgaggggtcgtgataagcttactgagattatggagaacgttgaaactgctgctgcatcat  
bacan-Ste ProPheArgValAlaGluValAspIleMetTyrGlyGluGlyIleSerArgGluGlyGluIleLeuAspMetAlaSerGluLeuAspIleVa  
-----ccattccgtggtgqgaagttgatattatgtaccgagaaggtatttcaagagaaggtgaaatcttagatagccctctgaacttgatgctg

BP0305phi tArgLysSerGlySerTrpPheTyrTyrGluLysGluAspGlyGluGlnIleGluAlaAlaGluAlaLeuValArgLysLysAspAspProValProGln  
gcgtaagtcaggctcatggttctattacgagaagaagacggtgagcagattgaagcagcagcagcacttctgtaagaagattgatccagaccgag  
bacan-Ste lGlnLysSerGlyAlaTrpTyrSerTyrAsnGluGluArgLeuGlyGlnGlyArgGluAsnSerLysGlnPheLeuLysGluAsnThrAspLeuArgGlu  
tcaaaagagcggctgcttactcttataatgaagaacgcttaggacaaggtcgtgaaaattcgaagcagcttctaaagaaaatacggatttagagaa

BP0305phi MetAlaLysAsnValProLeuLysPheProGlyLysThrLysPheArgGluPheMetThrAspAsnProTrpPheAlaGluGlnLeuArgGlnGluIleA  
atggcgaagaatgtaccattgaagttccgggtaaaacgaagttccggtgattcatgacggataatccggtgctgctgaaacgttgaactgctgagagattc  
bacan-Ste GluIleAlaPhePheIleArgGluHisHisGlyIleSerGluAspSerGlyAlaGluGlyMetGluAspProAsnLeuLeuAsp\*\*\*  
gaaattgcctctcttattcgtgacatcaggaattacggaagattcgtgctgctgaaagattggaagatccaactctcttgatata

BP0305phi rgGlyLysValLysGlnGlyGluLeuLeuProLysTyrGlnAspAlaAspGluMetLysAspIleGluGluLeuGluLysIleGluLysGlnIleAlaAl  
cggggaaggtaaaacaaggtgaactactccgaagatcaagatgctgatgaaatgaaagacatcgaagaacttgagaaaactcgagaagcaaatgcccgc

BP0305phi aGluGluGluAlaAlaLeuLysLysAlaSerAlaLysLysIleThrThrLysLysProValAlaAspLysLysProAlaThrLysProAlaArgLysThr  
agaggaagaagctctttgaagaagcgtcgcaagaagattacaacgaaaagccggtagcagataagaagccagcagcaaacctgcagctaaaaa

BP0305phi ProAlaLysLysProAlaGluLysLysGluThrThrGluIleVal\*\*\*  
ccagcgaagaagccagcgaagaagaacaaactgaaattgataa



# Figure S3

## B

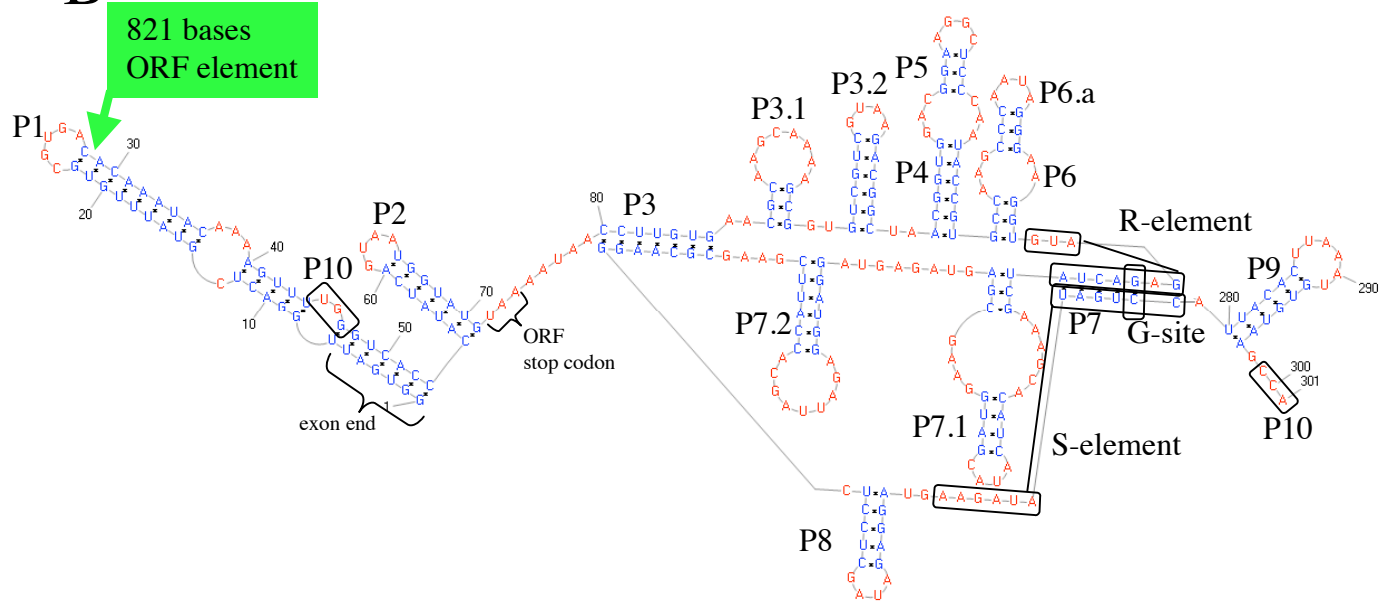

# Figure S4

## A

**Motif 1** E-value = 1.7e-010

| Loci    | Position | P-Value  | Sequence             |
|---------|----------|----------|----------------------|
| gp41-1  | 22       | 1.30e-08 | AGTTACACTTCTTATAAAT  |
| NrdA-1  | 0        | 3.49e-08 | GATTACACTTCCTATTATG  |
| NrdA-4  | 0        | 3.49e-08 | GAATACACATCTTACATTT  |
| NrdA-5  | 0        | 1.99e-09 | GATTACACTTCCTATAATG  |
| DnaE-1  | 26       | 2.01e-07 | ATTTACACCGCTTGCAAT   |
| DnaE-2  | 24       | 9.84e-07 | TAAATACCTCCTGCAACT   |
| NrdJ-1  | 26       | 1.44e-05 | GAATACAAGTTTCATCTAT  |
| NrdJ-2  | 38       | 1.64e-06 | GTTTACACATTTTCGAAAAG |
| IMPDH-1 | 1        | 3.64e-06 | GGAGGCATATCCTGTGAAT  |

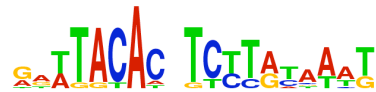

**Motif 2** E-value = 9.9e-003

| Loci    | Position | P-Value  | Sequence             |
|---------|----------|----------|----------------------|
| gp41-1  | 0        | 1.06e-07 | TAGTATAACTTACTGATATG |
| gp41-8  | 11       | 9.97e-07 | TGGCAACAGCTACTCAGAGG |
| NrdA-1  | 34       | 1.52e-07 | TAGGAAGTGTAATTTCTATA |
| NrdA-5  | 34       | 1.52e-07 | TAGGAAGGGTAATTTCTATA |
| DnaE-1  | 0        | 7.03e-07 | CAGGAGGTGTAATTAATATG |
| DnaE-2  | 0        | 6.08e-06 | TTGCAGGAGGTATATATTTA |
| NrdJ-2  | 58       | 5.11e-06 | TGGTAGAAAGGATTCTTATA |
| IMPDH-1 | 27       | 3.99e-07 | ATGTATGAGTGCCCTCTATA |

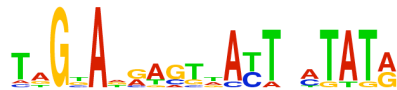

# Figure S4

## B

gp41-1 ATAGTGTGTGTA**AGTTACACTTCTTATAAA**TAAATAG**TAGTATAACTTACTGATATG** [1] 1.30e-08 [2] 1.06e-07

gp41-8 TAAATAATAT**TGGCAACAGCTACTCAGAGG**ATTTATG [1] 9.97e-07

NrdA-1 AATATTAT**TAGGAAGTGTAAATTTCTATA**TTTCATAAATAGTTATG**ATTACACTTCCTATTATG** [2] 1.52e-07 [1] 3.49e-08

NrdA-4 TAAAAAGGTGTATTCCATAATGTATGTAAAATATATATATCATTATG**GAATACACATCTTA**  
**CATTTATGCATATTTAGATCCTAGAAAACCTGGGGAATTCAAATATGGAAATTATATTTTC**  
GAATTTGAGCCTTTTTATATTGGTAAAGGCAAACCACAACCTGTTTACAATCGTATGTATA  
GACATTTAGAATTGTAAAATCGCTCCAGCTGC... [1] 3.49e-08

NrdA-5 ATATTAT**TAGGAAGGGTAATTTCTATA**TTTTATAAATAGTTATG**ATTACACTTCCTATAATG** [2] 1.52e-07 [1] 1.99e-09

DnaE-1 **ACATTTACACCGCTTGCA**TATAAATTAATTG**CAGGAGGTGTAATTAATATG** [1] 2.01e-07 [2] 7.03e-07

DnaE-2 TAAATTAGTAT**AATATACCTCCTGCAACT**ATTTG**TGCAGGAGGTATATATTTATG** [1] 9.84e-07 [2] 6.08e-06

NrdJ-1 GAAGTCAAGATATTTTAAACAAGGATAACAGAG**GAATACAAGTTTCATCTAT**TCAAGGAAGAA  
TATAAATTGAATTGTATG [1] 1.44e-05

NrdJ-2 AATCGAGATATTATAAATAGTATAAGGGT**TGGTAGAAAGGATTCTTATATGTTTACACATT**  
**TCGAAAAG**CGACAACACTACAAGAGTGGTATACCAATATAAAACAACAAAG... [2] 5.11e-06 [1] 1.64e-06

IMPDH-1 GGTACGAA**ATGTATGAGTGCCTCCTATA**TACATTAG**GAGGCATATCCTGTGAATAATG** [2] 3.99e-07 [1] 3.64e-06
